# Supplementary material for: Identification and Characterization of Salvia miltiorrhizain miRNAs in Response to Replanting Disease
Source: PubMed Central journal article supplement (PMC4970794; doi:10.1371/journal.pone.0159905), 2016-08-02
Supplement: pone.0159905.s001.pdf [file pone.0159905.s001.pdf]

1 Secondary structures of 7 novel miRNAs

1.Novel-miR008a
pri\_seq
t00706007\_x1
t00166860\_x1
t00691285\_x1
t01571169\_x3
t04054968\_x89
t01832491\_x1
t00492783\_x9
t03505451\_x6
t01431687\_x1
t03878032\_x3
t02643744\_x15
t01415527\_x42
t02322145\_x1466
t01706810\_x6
t03679060\_x1
t01928349\_x2

---- a g u gu u gau- cc
aguugc gagAGGGGAUGAUUUUAGGAAUGUUau agu gu ga gggc cucg u
ucgaag cUCUCUCUACUAAUGCCUUACAuaa uca ca cu cuug gagu c
gugu a - - au u auug cu

2.Novel-miR012a

pri\_seq
t04424978\_x5
t00447744\_x2
t00792533\_x15
t00585376\_x1
t03843385\_x9
t02093624\_x2
t04043063\_x1

uuuucacacacacauccucaaaacccuuuccauugcuccuucggagagcgcugugugcucuaaaacagccuacaauugcucucugaaaggagcccuag
gcucctUU CGGAG GCG UGUG GCu a
cgaGGAA GUCUU UGC ACAU cga a
-----gaucc A C UU C caa

3.Novel-miR017

pri\_seq
t01569569\_x12
t01439413\_x2
t00262521\_x5
t02681595\_x472
t00294883\_x23
t04117279\_x1
t04216510\_x3
t00415283\_x1
t04392981\_x8
t04020743\_x6
t01161351\_x3
t02013798\_x99
t02593924\_x49
t00494785\_x433
t03469120\_x8
t04058079\_x2
t03050152\_x3
t04099199\_x2

-----uuu G G A - ug
guGGUGCAAUGG C AACGCCG GGu gg u
CACCACGUUACU G UUGCGCG cca cc u
uuuaguguauuacuaacacu - - C a ug

4.Novel-miR021a

pri\_seq
t02380915\_x3
t00621995\_x4
t03696389\_x20
t00117061\_x2

-- C C Aaa- ucg
cuacaUCG CGG GAUCACCAGAAUC gug c
ggUGUAGU GCC UUAUGUGUCUUAg cac a
uu A - acga uac
