# Supplementary material for: Identification and Characterization of Salvia miltiorrhizain miRNAs in Response to Replanting Disease
Source: PubMed Central journal article supplement (PMC4970794; doi:10.1371/journal.pone.0159905), 2016-08-02
Supplement: pone.0159905.s002.pdf [file pone.0159905.s002.pdf]

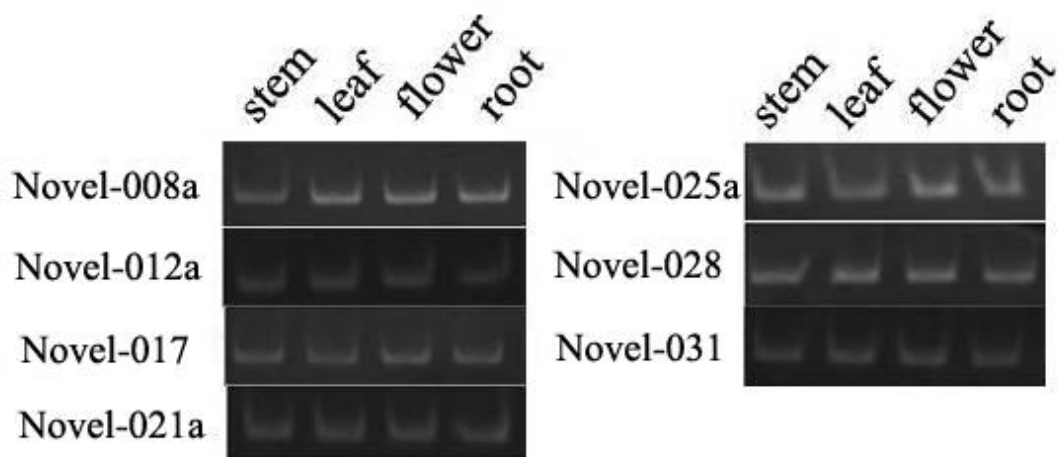

Figure S2: RT-PCR products of the 7 novel miRNAs in the root, stem, leaf and flower of *S. miltiorrhiza*.
