# Supplementary material for: Identification and Characterization of Salvia miltiorrhizain miRNAs in Response to Replanting Disease
Source: PubMed Central journal article supplement (PMC4970794; doi:10.1371/journal.pone.0159905), 2016-08-02
Supplement: pone.0159905.s003.pdf [file pone.0159905.s003.pdf]

**A**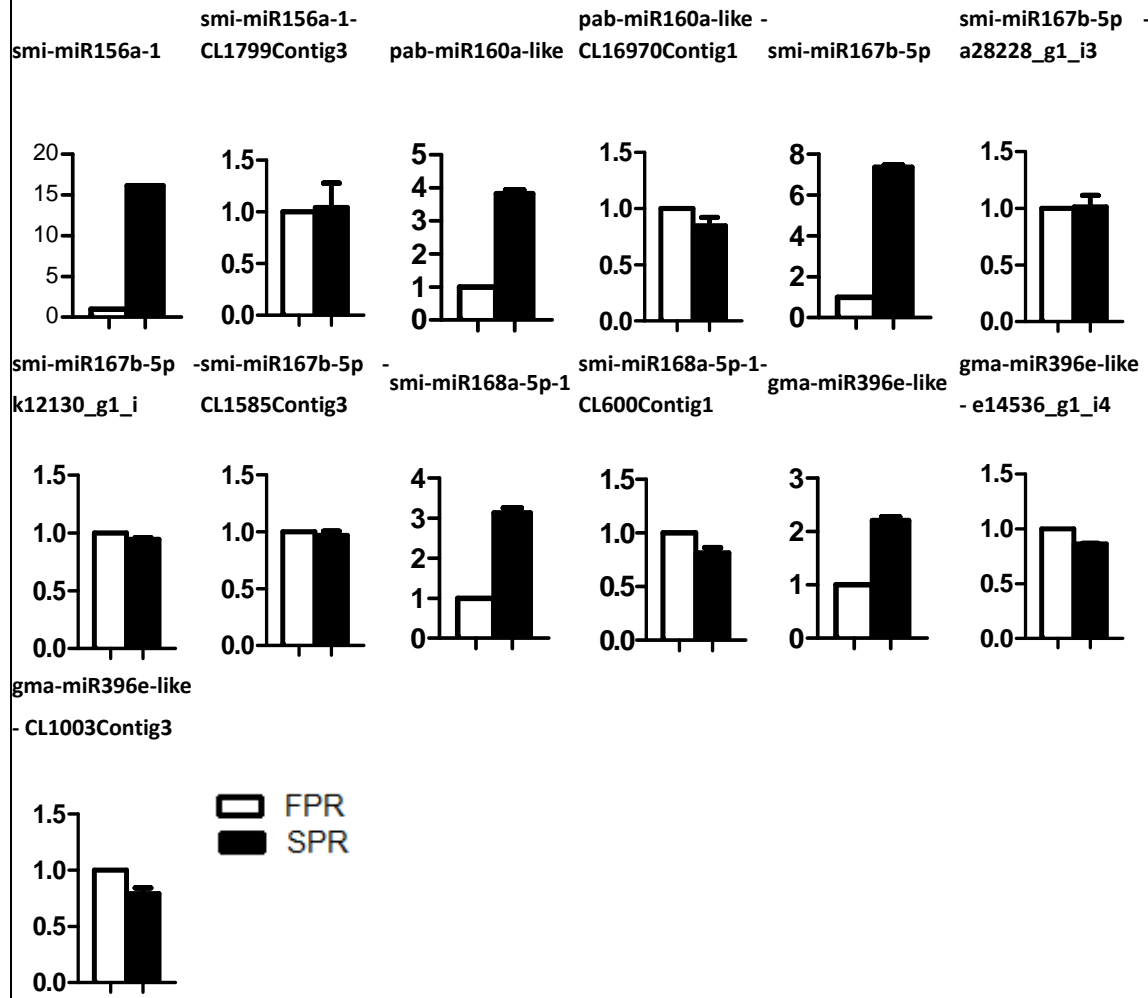**B**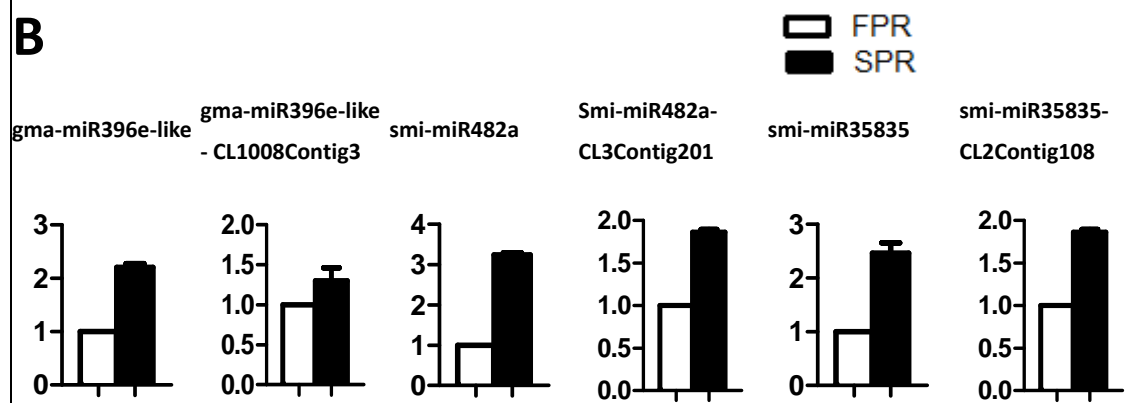

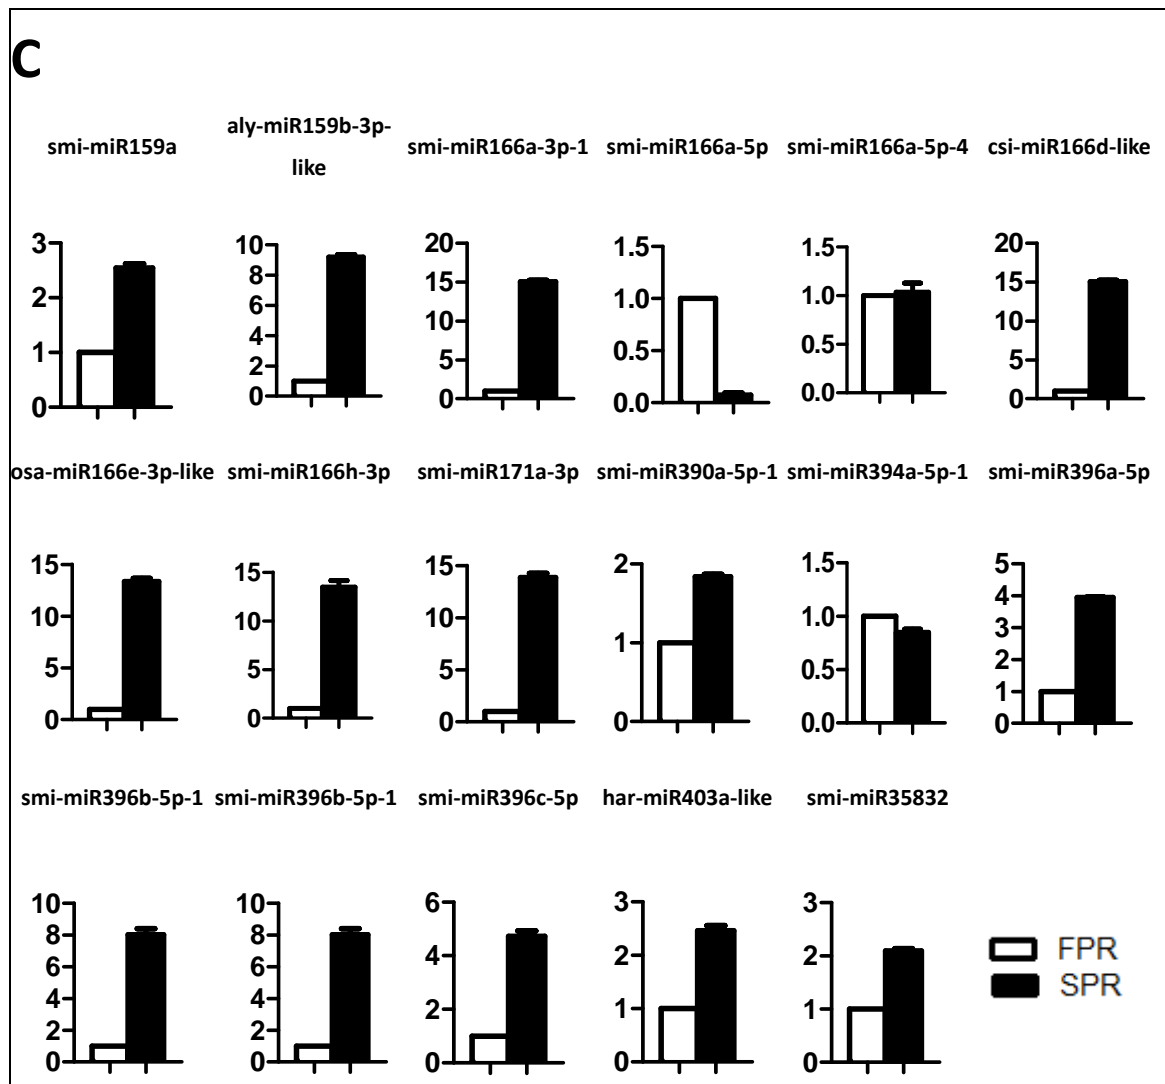

**S 3 Fig.** Comparison of the expression levels from differential expression miRNAs and the targets between FPR and SPR using qRT-PCR. **A** The miRNAs were significantly upregulated and the targets were no significant differential expression in SPR; **B** The miRNAs and the targets were both significantly upregulated in SPR; **C** Differential expression miRNAs without matching targets.
